# Supplementary material
Source: publisher figshare collection journal article supplement (https://acs.figshare.com/ndownloader/files/20136806)
Supplement: Supplementary file 1 [file 20136806]

# Supporting Information

## Strong Metal-Adsorbate Interactions Increase the Reactivity and Decrease the Orientational Order of OH- functionalized N-Heterocyclic Carbene Monolayers

*Shahar Dery<sup>a</sup>, Iris Berg<sup>a</sup>, Suhong Kim<sup>b</sup>, Albano Cossaro<sup>c</sup>, Alberto Verdini<sup>c</sup>, Luca Floreano<sup>c</sup>,  
F. Dean Toste<sup>b</sup> and Elad Gross<sup>\*a</sup>*

<sup>a</sup> Institute of Chemistry and The Center for Nanoscience and Nanotechnology, The Hebrew University, Jerusalem 91904, Israel

<sup>b</sup> Department of Chemistry, University of California, Berkeley, California 94720, United States

<sup>c</sup> CNR-IOM, Laboratorio Nazionale TASC, Basovizza SS-14, Trieste 34012, Italy

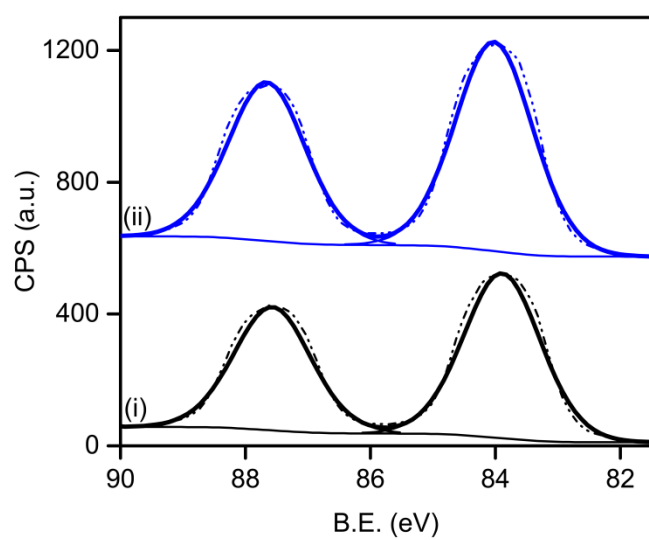

**Figure S1.** Au4f XPS signal of OH-NHCs/Au(111) before (i) and after (ii) annealing to 200 °C.

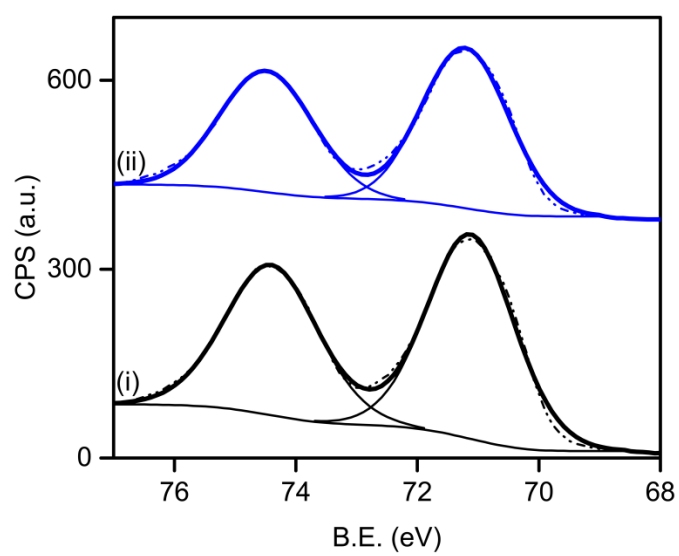

**Figure S2.** Pt4f XPS signal of OH-NHCs/Pt(111) before (i) and after (ii) annealing to 200 °C.

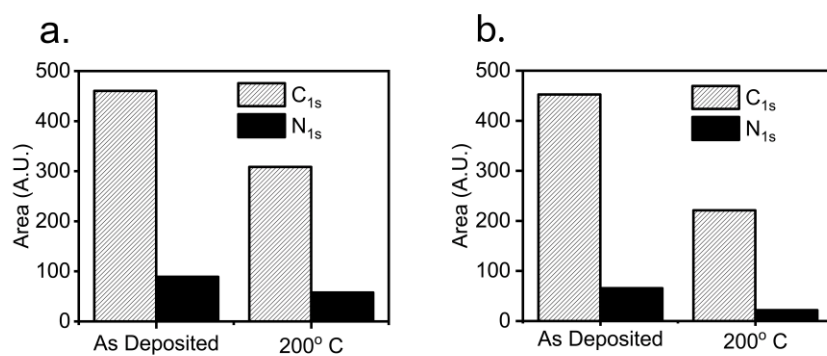

**Figure S3.** Comparative area analysis of C<sub>1s</sub> and N<sub>1s</sub> XPS peaks of the anchored OH-functionalized NHCs on (a) Au (111) and (b) Pt (111) before (left) and following (right) the annealing process.
